# Supplementary material
Source: publisher site journal article supplement (https://www.spandidos-publications.com/2404/downloadSupplementary)
Supplement: Supplementary file 1 [file downloadSupplementary]

## Sheet: Table SIV
Table SIV: GO analysis of P4HB-related genes
ID	Description	p-value	q-value	geneID	Count
GO:0004576	oligosaccharyl transferase activity	5.26e-08	2.02e-05	RPN1/RPN2/DDOST/STT3A/OSTC	5
GO:0016758	transferase activity, transferring hexosyl groups	5.36e-05	0.0103062	RPN1/RPN2/DDOST/SDF2/RFNG/SDF2L1/ALG3/STT3A/XYLT2/OSTC/CHPF	11
GO:0043021	ribonucleoprotein complex binding	0.000183546	0.0194496	RPN2/SEC61A1/NME1/ERAL1/PPP1CA/EIF4A3/SRP68/HSPA5	8
GO:0005048	signal sequence binding	0.00020249	0.0194496	SEC61A1/KDELR2/SRP68/KDELR1/KPNA5	5
GO:0016757	transferase activity, transferring glycosyl groups	0.000514138	0.0370279	RPN1/RPN2/DDOST/SDF2/RFNG/SDF2L1/ALG3/STT3A/XYLT2/OSTC/CHPF	11
GO:0015037	peptide disulfide oxidoreductase activity	0.00066527	0.0370279	P4HB/PDIA4/PDIA3	3
GO:0003756	protein disulfide isomerase activity	0.000811692	0.0370279	P4HB/PDIA4/PDIA3	3
GO:0016864	intramolecular oxidoreductase activity, transposing S-S bonds	0.000811692	0.0370279	P4HB/PDIA4/PDIA3	3
GO:0004553	hydrolase activity, hydrolyzing O-glycosyl compounds	0.000867366	0.0370279	NEU1/MOGS/MAN1B1/ADPRHL2/NAGLU/EDEM2	6
